# Supplementary material for: Encapsulation of cobaltocenium ions in a zeolite-like metal–organic framework
Source: Royal Society of Chemistry journal article supplement (doi:10.1039/d3nj03663d), 2023-01-01
Supplement: d3nj03663d1.pdf [file d3nj03663d1.pdf]

## Encapsulation of cobaltocenium ions in a zeolite-like metal-organic framework

Muhammad Abbas,<sup>a,†</sup> Anne M. Marti,<sup>a,†</sup> Arslan Umer,<sup>a</sup> Monu Joy,<sup>a</sup> Ya-Ching Yang,<sup>b</sup> Sue-Lein Wang,<sup>b</sup> and Kenneth J. Balkus, Jr.<sup>a,\*</sup>

<sup>a</sup> Department of Chemistry and Biochemistry, The University of Texas at Dallas, 800 West Campbell Road, Richardson, Texas 75080, United States

<sup>b</sup> Department of Chemistry, National Tsing Hua University, Hsinchu 30013, Taiwan

<sup>†</sup> Authors contributed equally

\*Correspondence: Prof. Kenneth J. Balkus, Jr. ([balkus@utdallas.edu](mailto:balkus@utdallas.edu))

## Experimental Methods

### Powder X-ray diffraction (PXRD)

The PXRD patterns were collected on an Ultima IV X-ray diffractometer (Rigaku) equipped with Cu K<sub>α</sub> source, with a scan rate of 2°/min and a step size of 0.04°. The simulated XRD pattern of the ZMOF was generated using the crystal structure visualization tool Mercury (CCDC), from the CIF file obtained via SC-XRD results.

### Scanning electron microscope (SEM)

The morphology of all crystals was characterized using an SEM (Leo 1530 VP field emission scanning electron microscope). Samples were coated with Au using a Denton Vacuum Desk II sputter-coater for SEM analysis.

### Thermogravimetric analysis (TGA)

The TGA was conducted using a SDT Q600 (TA Instruments). The samples were heated from room temperature to 600 °C at a rate of 5 °C/min under nitrogen.

### Fourier transform infrared spectroscopy (FT-IR)

The FT-IR spectra was collected using the Nicolet 380 FT-IR ATR spectrometer.

### Elemental analysis

The elemental analysis of Cp<sub>2</sub>Co<sup>+</sup>-sod-ZMOF was completed by Galbraith Laboratories, Inc. Found C: 39.11 wt. %, N: 9.18 wt. %, In: 18.80 wt. %, Co: 9.44 wt. %, theoretical C: 39.24, N: 9.15, In:18.75, and Co:9.62 wt. %. The Total Reflection X-ray Fluorescence (TXRF) was measured on the S2 PICOFOX (Bruker) equipped with Mo K<sub>α</sub> radiation with a high-efficiency module. The radiation source was operated at 50 kV and 600 μA and data was collected for 300 s. About 20 mg of sample was used for analysis to find metal ratios in Cp<sub>2</sub>Co<sup>+</sup>-sod-ZMOF. The indium to cobalt ratio was found to be Co: 31.8 % and In: 68.1 % which was in agreement with the elemental analysis.

## Gas adsorption analysis

The adsorption and desorption isotherms using ultra-high purity CO<sub>2</sub> and N<sub>2</sub> (>99.9999%) were obtained on an ASAP 2020 Plus (Micromeritics instrument corporation). For the surface area and porosity analysis, the MOF crystals were washed three times with fresh DMF and activated at 120°C under vacuum for 24 hours. Activated and dried (~50 mg) samples were transferred to analysis tubes equipped with filler rods and capped with a seal frit. The samples were further dried and evacuated in the instrument for 10 hours at 120°C. Samples were weighed again after the activation step to get the dry sample weight. The isotherms were measured from a relative pressure P/P<sub>0</sub> of 0.01 to 1 in a liquid nitrogen (77 K) bath and from 0.0001 to 0.035 for CO<sub>2</sub> (273 K) in an ice bath. The surface area was calculated by the Brunauer–Emmett–Teller (BET) model.

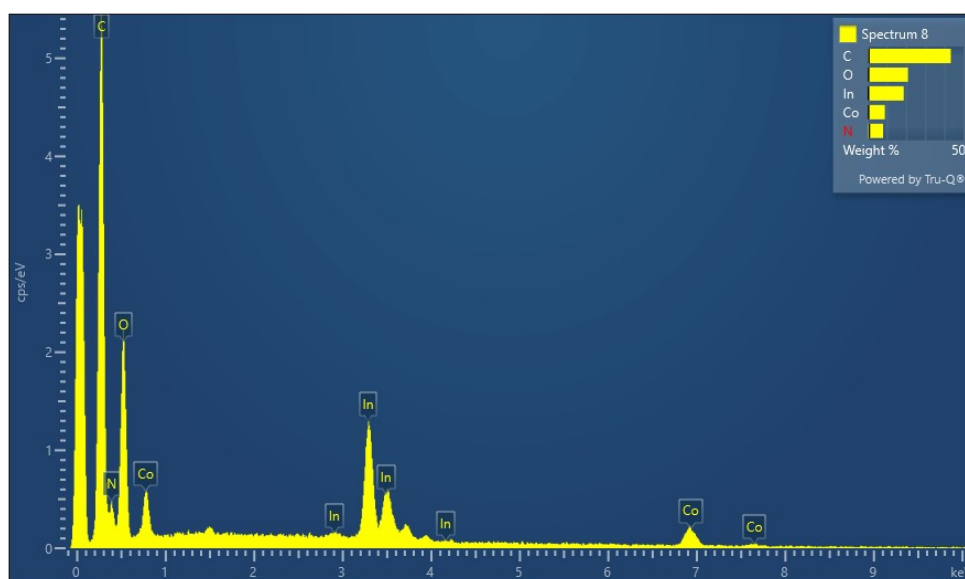

**Figure S1.** The EDS spectra for Cp<sub>2</sub>Co<sup>+</sup>-sod-ZMOF

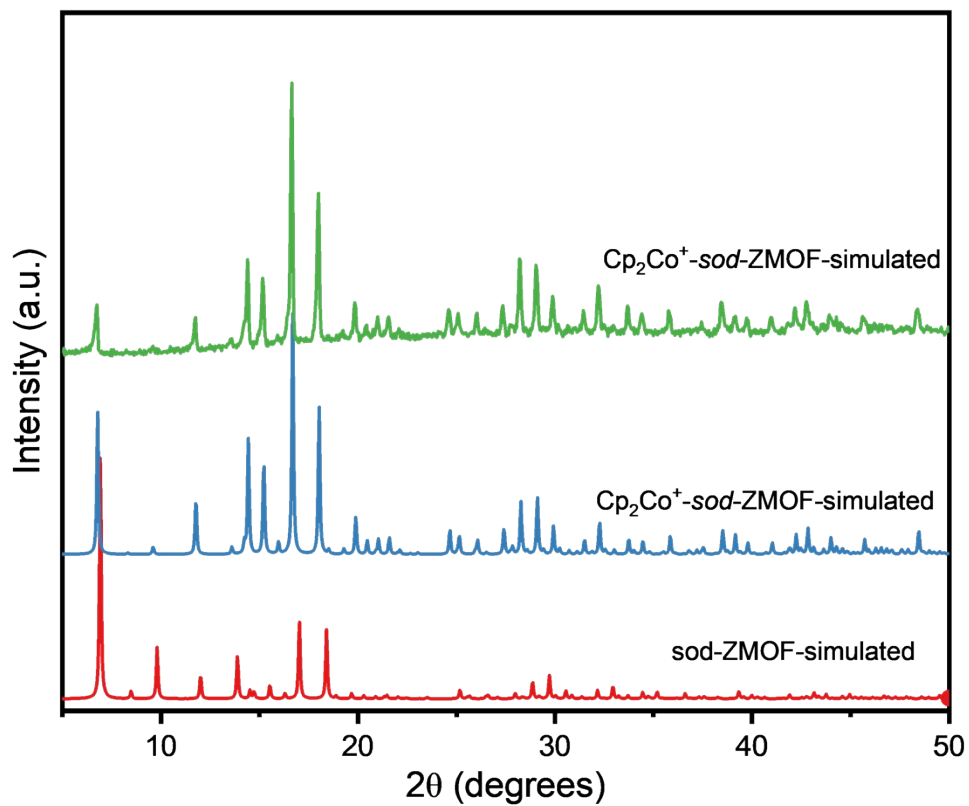

**Figure S2.** The PXR D comparison of sod-ZMOF, with **Cp<sub>2</sub>Co<sup>+</sup>-sod-ZMOF**, showing the peak shifts in the **Cp<sub>2</sub>Co<sup>+</sup>-sod-ZMOF** as a result of framework expansion.

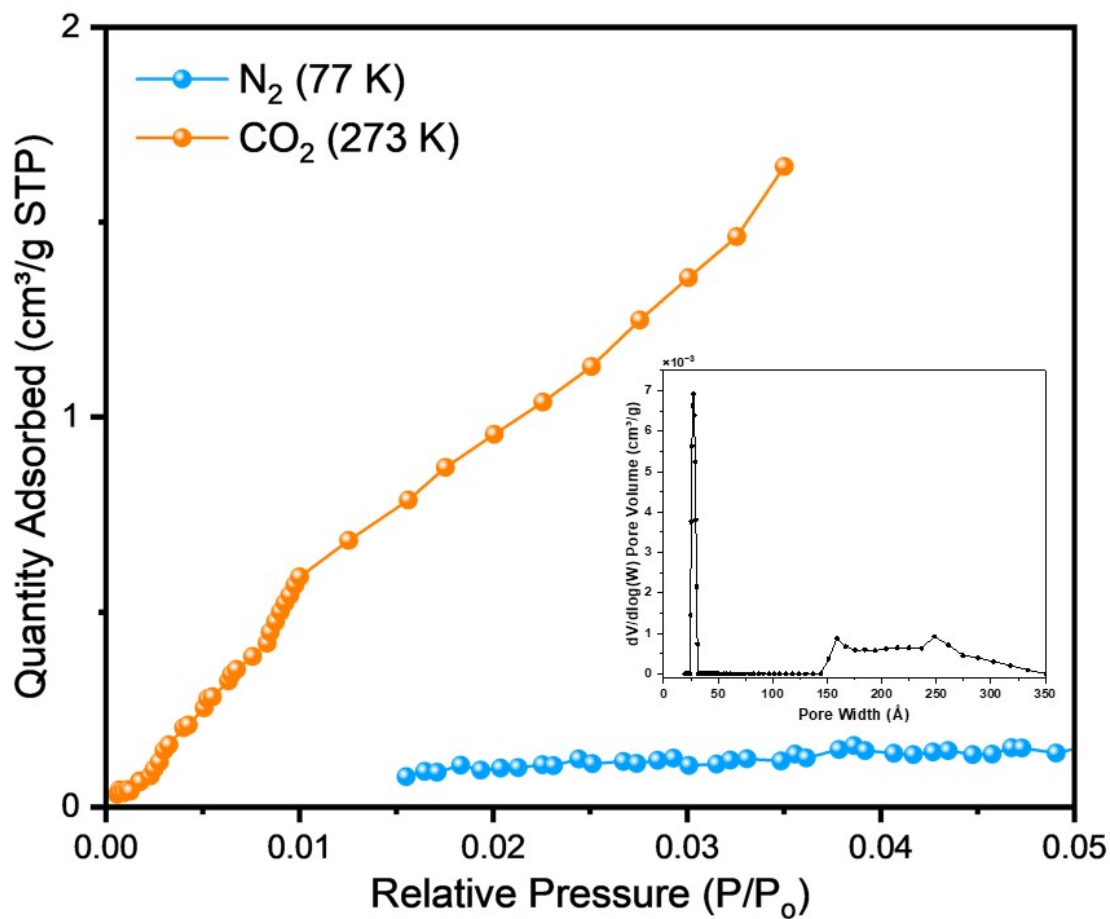

Figure S3. Gas adsorption isotherms of  $\text{Cp}_2\text{Co}^+\text{-sod-ZMOF}$

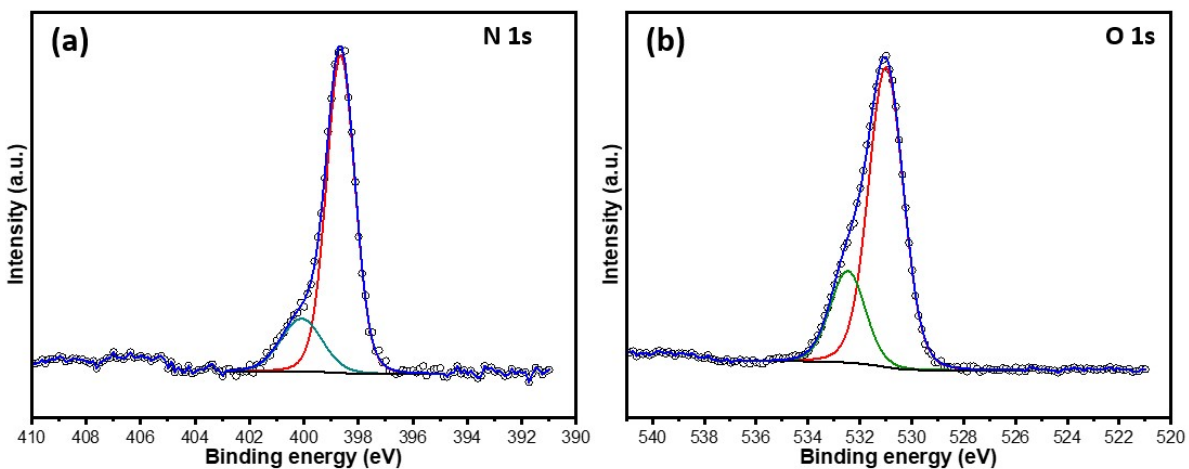

Figure S4. High resolution XPS spectra for  $\text{Cp}_2\text{Co}^+\text{-sod-ZMOF}$  (a) N 1s, and (b) O 1s

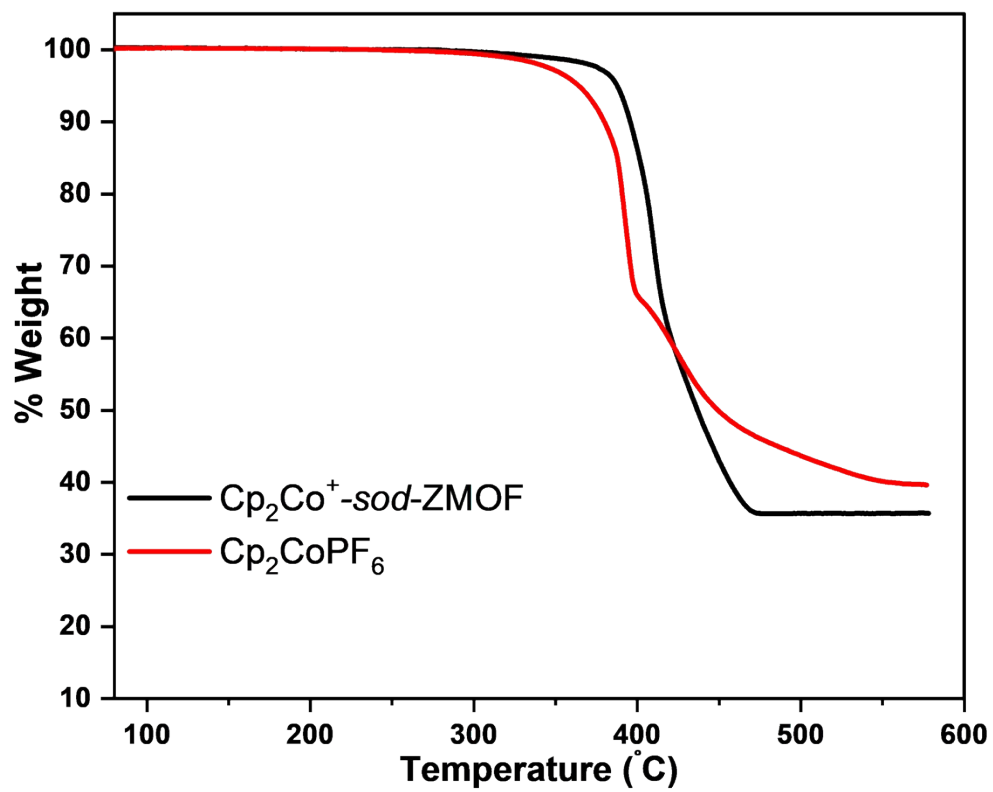

Figure S5. TGA curves of  $\text{Cp}_2\text{Co}^+\text{-sod-ZMOF}$  and the  $\text{Cp}_2\text{CoPF}_6$  compound.

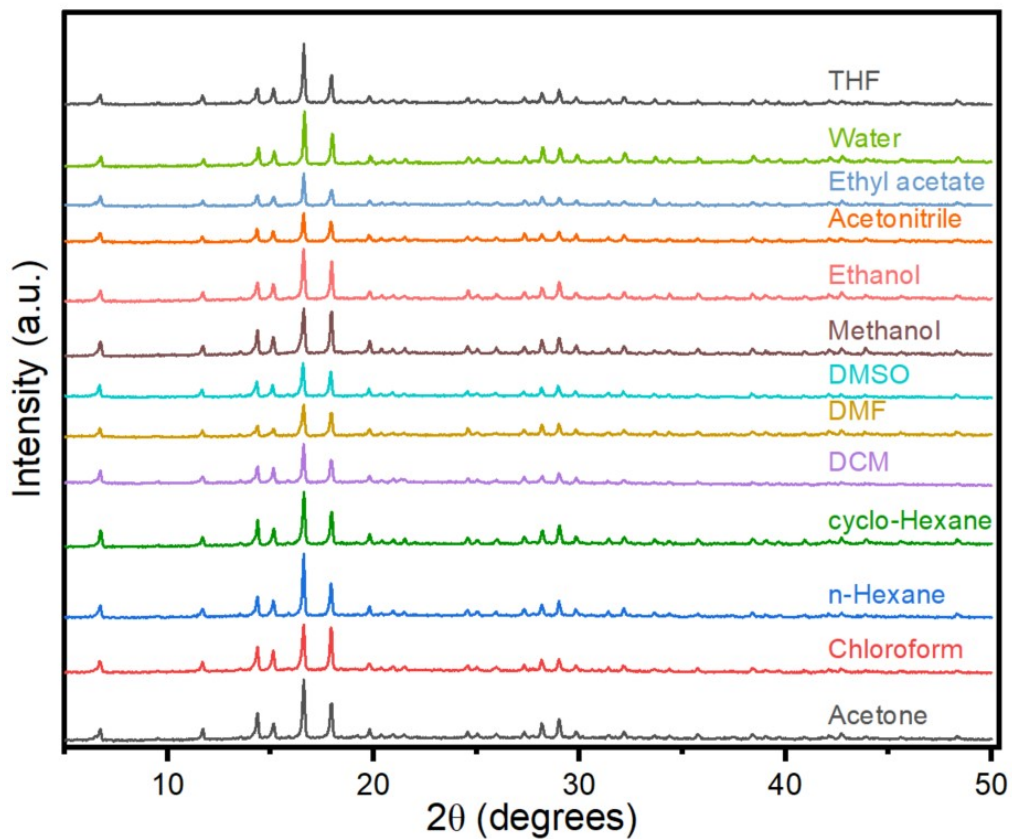

Figure S6. PXRD patterns  $\text{Cp}_2\text{Co}^+\text{-sod-ZMOF}$  in different lab solvents.

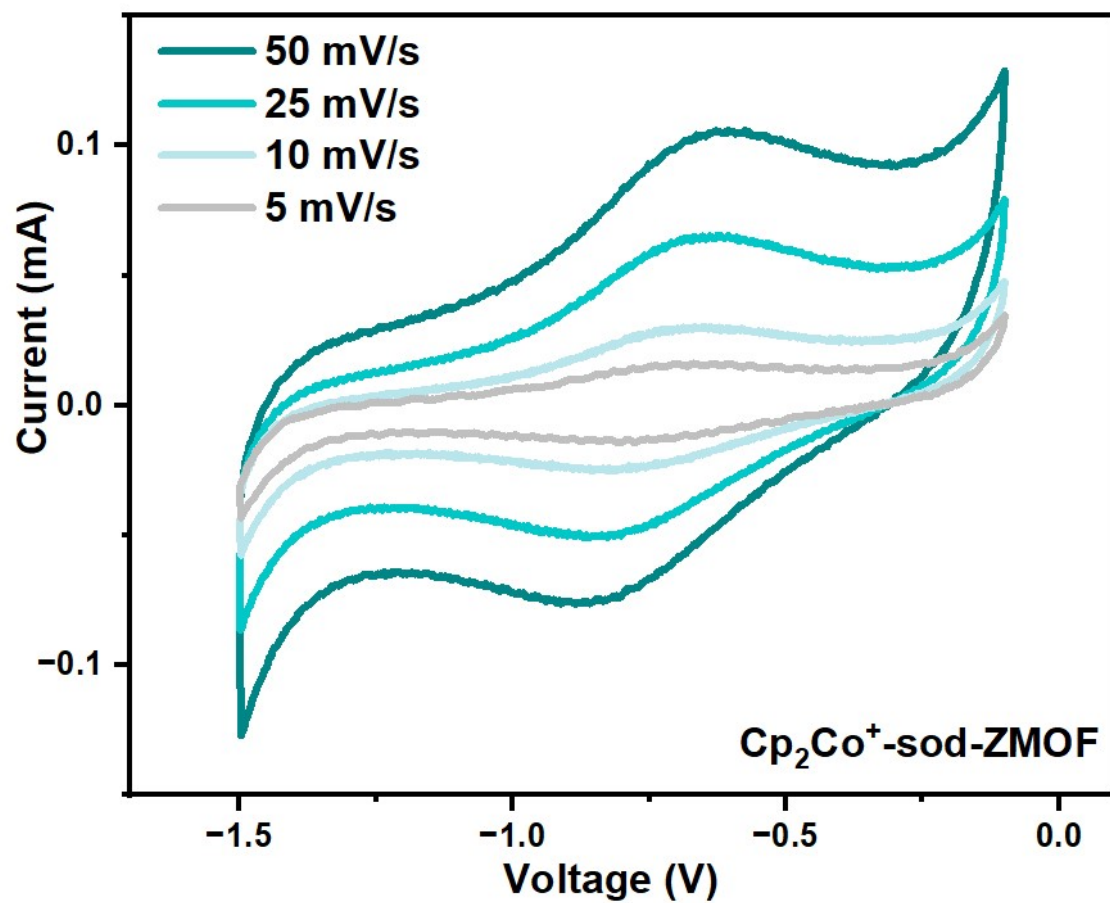

Figure S7. CV curves of  $\text{Cp}_2\text{Co}^+\text{-sod-ZMOF}$  at different scan rates.

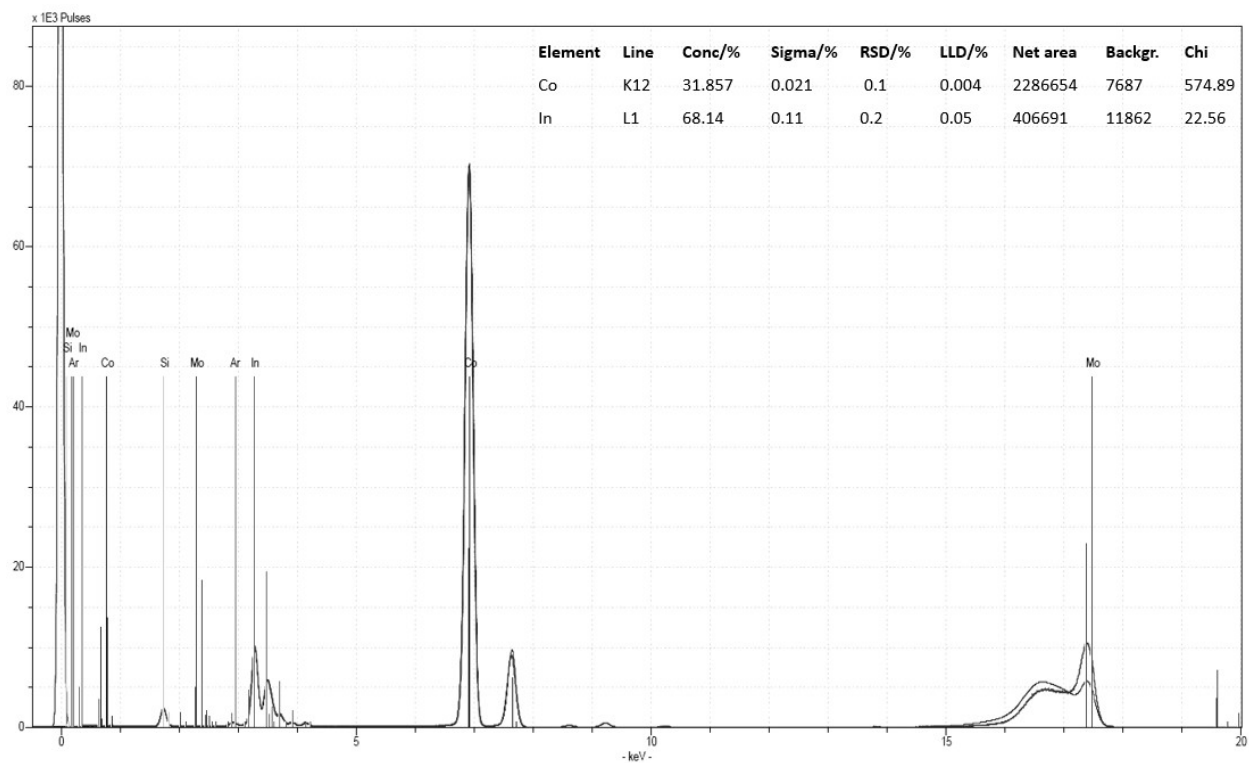

**Figure S8.** The TXRF spectrum of the **Cp<sub>2</sub>Co<sup>+</sup>-sod-ZMOF**.



Table S1. Crystal data and structure refinement for **Cp<sub>2</sub>Co<sup>+</sup>-sod-ZMOF**

|                                   |                                                                   |         |
|-----------------------------------|-------------------------------------------------------------------|---------|
| Identification code               | <b>2261904</b>                                                    |         |
| Empirical formula                 | C <sub>20</sub> H <sub>14</sub> CoInN <sub>4</sub> O <sub>8</sub> |         |
| Formula weight                    | 612.10                                                            |         |
| Temperature                       | 200(2) K                                                          |         |
| Wavelength                        | 0.71073 Å                                                         |         |
| Crystal system                    | Cubic                                                             |         |
| Space group                       | F d -3 c                                                          |         |
| Unit cell dimensions              | a = 36.778(4) Å                                                   | a = 90° |
|                                   | b = 36.778(4) Å                                                   | b = 90° |
|                                   | c = 36.778(4) Å                                                   | g = 90° |
| Volume                            | 49745(17) Å <sup>3</sup>                                          |         |
| Z                                 | 96                                                                |         |
| Density (calculated)              | 1.962 Mg/m <sup>3</sup>                                           |         |
| Absorption coefficient            | 1.972 mm <sup>-1</sup>                                            |         |
| F(000)                            | 28992                                                             |         |
| Crystal size                      | 0.100 x 0.070 x 0.070 mm <sup>3</sup>                             |         |
| Theta range for data collection   | 2.713 to 28.687°.                                                 |         |
| Index ranges                      | -49<=h<=29, -46<=k<=48, -46<=l<=38                                |         |
| Reflections collected             | 48380                                                             |         |
| Independent reflections           | 2681 [R(int) = 0.0371]                                            |         |
| Completeness to theta = 25.242°   | 99.4 %                                                            |         |
| Refinement method                 | Full-matrix least-squares on F <sup>2</sup>                       |         |
| Data / restraints / parameters    | 2681 / 511 / 312                                                  |         |
| Goodness-of-fit on F <sup>2</sup> | 1.228                                                             |         |
| Final R indices [I>2sigma(I)]     | R1 = 0.0273, wR2 = 0.0586                                         |         |
| R indices (all data)              | R1 = 0.0335, wR2 = 0.0632                                         |         |
| Extinction coefficient            | n/a                                                               |         |
| Largest diff. peak and hole       | 0.371 and -0.480 e.Å <sup>-3</sup>                                |         |

Table S2. Atomic coordinates ( $\times 10^4$ ) and equivalent isotropic displacement parameters ( $\text{\AA}^2 \times 10^3$ ) for **Cp<sub>2</sub>Co<sup>+</sup>-sod-ZMOF**. U(eq) is defined as one third of the trace of the orthogonalized U<sup>ij</sup> tensor.

|       | x        | y        | z        | U(eq) |
|-------|----------|----------|----------|-------|
| In(1) | 5000     | 6193(1)  | 3693(1)  | 29(1) |
| O(1)  | 6364(1)  | 7202(1)  | 3107(1)  | 44(1) |
| O(3)  | 5258(1)  | 6084(1)  | 3133(1)  | 37(1) |
| N(1)  | 5827(1)  | 7057(1)  | 3620(1)  | 30(1) |
| N(2)  | 5403(1)  | 6623(1)  | 3616(1)  | 29(1) |
| C(1)  | 5547(1)  | 6904(1)  | 3796(1)  | 30(1) |
| C(2)  | 5863(1)  | 6861(1)  | 3303(1)  | 33(1) |
| C(3)  | 5602(1)  | 6594(1)  | 3302(1)  | 33(1) |
| C(4)  | 5500(1)  | 6306(1)  | 3037(1)  | 41(1) |
| C(5)  | 6146(1)  | 6962(1)  | 3038(1)  | 43(1) |
| O(2B) | 6115(9)  | 6813(8)  | 2711(5)  | 56(3) |
| O(4B) | 5632(8)  | 6335(9)  | 2722(4)  | 52(3) |
| O(2A) | 6194(15) | 6744(14) | 2760(13) | 53(6) |
| O(4A) | 5713(15) | 6258(13) | 2761(12) | 49(6) |
| Co(1) | 5526(1)  | 5526(1)  | 1974(1)  | 29(1) |
| C(16) | 5104(8)  | 5539(9)  | 2323(13) | 35(4) |
| C(17) | 5422(9)  | 5430(8)  | 2510(5)  | 28(3) |
| C(18) | 5549(8)  | 5105(8)  | 2344(12) | 31(4) |
| C(19) | 5314(16) | 5023(9)  | 2052(8)  | 36(4) |
| C(20) | 5042(9)  | 5292(17) | 2036(8)  | 39(4) |
| C(21) | 5948(6)  | 5912(7)  | 1996(6)  | 30(4) |
| C(22) | 5617(5)  | 6069(4)  | 1874(7)  | 25(2) |
| C(23) | 5502(6)  | 5872(9)  | 1566(6)  | 31(3) |
| C(24) | 5760(10) | 5597(6)  | 1496(6)  | 35(3) |
| C(25) | 6025(7)  | 5611(6)  | 1766(10) | 37(4) |
| Co(2) | 5000     | 7500     | 2500     | 38(1) |
| C(6)  | 4793(11) | 7573(8)  | 3014(9)  | 46(7) |
| C(7)  | 4918(9)  | 7212(8)  | 2956(8)  | 45(5) |
| C(8)  | 4716(8)  | 7061(6)  | 2661(8)  | 47(5) |
| C(9)  | 4464(7)  | 7327(8)  | 2541(7)  | 48(6) |
| C(10) | 4529(9)  | 7653(7)  | 2741(10) | 48(7) |

|       |          |         |          |       |
|-------|----------|---------|----------|-------|
| C(11) | 5454(8)  | 7789(9) | 2409(8)  | 50(6) |
| C(12) | 5509(8)  | 7437(8) | 2275(11) | 53(7) |
| C(13) | 5228(11) | 7361(8) | 2028(11) | 55(8) |
| C(14) | 5036(8)  | 7685(9) | 1969(8)  | 56(7) |
| C(15) | 5163(9)  | 7943(7) | 2217(8)  | 53(6) |

---

Table S3. Bond lengths [Å] and angles [°] for **Cp<sub>2</sub>Co<sup>+</sup>-sod-ZMOF**.

---

|              |            |
|--------------|------------|
| In(1)-N(2)#1 | 2.185(2)   |
| In(1)-N(2)   | 2.185(2)   |
| In(1)-N(1)#2 | 2.223(2)   |
| In(1)-N(1)#3 | 2.223(2)   |
| In(1)-O(3)#1 | 2.302(2)   |
| In(1)-O(3)   | 2.3025(19) |
| O(1)-C(5)    | 1.219(4)   |
| O(3)-C(4)    | 1.257(4)   |
| N(1)-C(1)    | 1.339(3)   |
| N(1)-C(2)    | 1.377(3)   |
| N(2)-C(1)    | 1.339(3)   |
| N(2)-C(3)    | 1.370(3)   |
| C(1)-H(1)    | 0.9500     |
| C(2)-C(3)    | 1.374(4)   |
| C(2)-C(5)    | 1.475(4)   |
| C(3)-C(4)    | 1.486(4)   |
| C(4)-O(4B)   | 1.263(14)  |
| C(4)-O(4A)   | 1.30(3)    |
| C(5)-O(2A)   | 1.31(3)    |
| C(5)-O(2B)   | 1.326(16)  |
| O(2B)-H(2B)  | 0.8400     |
| O(2A)-H(2A)  | 0.8400     |
| Co(1)-C(23)  | 1.97(2)    |
| Co(1)-C(24)  | 1.973(13)  |
| Co(1)-C(20)  | 1.992(16)  |
| Co(1)-C(25)  | 2.012(18)  |
| Co(1)-C(16)  | 2.02(3)    |
| Co(1)-C(19)  | 2.030(19)  |
| Co(1)-C(17)  | 2.040(19)  |
| Co(1)-C(22)  | 2.055(16)  |
| Co(1)-C(18)  | 2.06(3)    |
| Co(1)-C(21)  | 2.102(19)  |
| C(16)-C(20)  | 1.409(11)  |
| C(16)-C(17)  | 1.418(12)  |

|             |           |
|-------------|-----------|
| C(16)-H(16) | 0.9500    |
| C(17)-C(18) | 1.422(11) |
| C(17)-H(17) | 0.9500    |
| C(18)-C(19) | 1.410(11) |
| C(18)-H(18) | 0.9500    |
| C(19)-C(20) | 1.412(11) |
| C(19)-H(19) | 0.9500    |
| C(20)-H(20) | 1.0000    |
| C(21)-C(25) | 1.418(11) |
| C(21)-C(22) | 1.420(11) |
| C(21)-H(21) | 0.9500    |
| C(22)-C(23) | 1.409(11) |
| C(22)-H(22) | 0.9500    |
| C(23)-C(24) | 1.413(11) |
| C(23)-H(23) | 0.9500    |
| C(24)-C(25) | 1.393(11) |
| C(24)-H(24) | 1.0000    |
| C(25)-H(25) | 0.9500    |
| Co(2)-C(13) | 2.00(4)   |
| Co(2)-C(7)  | 2.01(3)   |
| Co(2)-C(11) | 2.01(3)   |
| Co(2)-C(8)  | 2.01(2)   |
| Co(2)-C(10) | 2.02(4)   |
| Co(2)-C(15) | 2.03(2)   |
| Co(2)-C(6)  | 2.05(4)   |
| Co(2)-C(12) | 2.06(3)   |
| Co(2)-C(14) | 2.07(3)   |
| Co(2)-C(9)  | 2.08(3)   |
| C(6)-C(7)   | 1.42(2)   |
| C(6)-C(10)  | 1.43(2)   |
| C(6)-H(6)   | 0.9500    |
| C(7)-C(8)   | 1.425(19) |
| C(7)-H(7)   | 0.9500    |
| C(8)-C(9)   | 1.42(2)   |
| C(8)-H(8)   | 0.9500    |
| C(9)-C(10)  | 1.43(2)   |

|                     |            |
|---------------------|------------|
| C(9)-H(9)           | 0.9500     |
| C(10)-H(10)         | 0.9500     |
| C(11)-C(15)         | 1.40(2)    |
| C(11)-C(12)         | 1.40(2)    |
| C(11)-H(11)         | 0.9500     |
| C(12)-C(13)         | 1.40(2)    |
| C(12)-H(12)         | 0.9500     |
| C(13)-C(14)         | 1.40(2)    |
| C(13)-H(13)         | 0.9500     |
| C(14)-C(15)         | 1.40(2)    |
| C(14)-H(14)         | 0.9500     |
| C(15)-H(15)         | 0.9500     |
|                     |            |
| N(2)#1-In(1)-N(2)   | 130.41(11) |
| N(2)#1-In(1)-N(1)#2 | 88.91(8)   |
| N(2)-In(1)-N(1)#2   | 101.24(8)  |
| N(2)#1-In(1)-N(1)#3 | 101.24(8)  |
| N(2)-In(1)-N(1)#3   | 88.91(8)   |
| N(1)#2-In(1)-N(1)#3 | 155.80(11) |
| N(2)#1-In(1)-O(3)#1 | 74.32(7)   |
| N(2)-In(1)-O(3)#1   | 154.67(8)  |
| N(1)#2-In(1)-O(3)#1 | 82.51(8)   |
| N(1)#3-In(1)-O(3)#1 | 79.27(8)   |
| N(2)#1-In(1)-O(3)   | 154.66(8)  |
| N(2)-In(1)-O(3)     | 74.32(7)   |
| N(1)#2-In(1)-O(3)   | 79.27(8)   |
| N(1)#3-In(1)-O(3)   | 82.51(8)   |
| O(3)#1-In(1)-O(3)   | 81.92(10)  |
| C(4)-O(3)-In(1)     | 115.45(17) |
| C(1)-N(1)-C(2)      | 105.3(2)   |
| C(1)-N(1)-In(1)#4   | 128.53(17) |
| C(2)-N(1)-In(1)#4   | 125.99(18) |
| C(1)-N(2)-C(3)      | 105.4(2)   |
| C(1)-N(2)-In(1)     | 139.79(18) |
| C(3)-N(2)-In(1)     | 114.50(17) |
| N(2)-C(1)-N(1)      | 112.9(2)   |

|                   |           |
|-------------------|-----------|
| N(2)-C(1)-H(1)    | 123.6     |
| N(1)-C(1)-H(1)    | 123.6     |
| C(3)-C(2)-N(1)    | 108.0(2)  |
| C(3)-C(2)-C(5)    | 132.3(3)  |
| N(1)-C(2)-C(5)    | 119.7(3)  |
| N(2)-C(3)-C(2)    | 108.4(2)  |
| N(2)-C(3)-C(4)    | 118.3(3)  |
| C(2)-C(3)-C(4)    | 133.4(3)  |
| O(3)-C(4)-O(4B)   | 125.7(9)  |
| O(3)-C(4)-O(4A)   | 123.9(15) |
| O(3)-C(4)-C(3)    | 117.2(3)  |
| O(4B)-C(4)-C(3)   | 116.5(10) |
| O(4A)-C(4)-C(3)   | 117.4(16) |
| O(1)-C(5)-O(2A)   | 121.1(16) |
| O(1)-C(5)-O(2B)   | 123.0(10) |
| O(1)-C(5)-C(2)    | 120.6(3)  |
| O(2A)-C(5)-C(2)   | 117.1(15) |
| O(2B)-C(5)-C(2)   | 115.8(10) |
| C(5)-O(2B)-H(2B)  | 109.5     |
| C(5)-O(2A)-H(2A)  | 109.5     |
| C(23)-Co(1)-C(24) | 42.0(4)   |
| C(23)-Co(1)-C(20) | 109.1(10) |
| C(24)-Co(1)-C(20) | 123.3(14) |
| C(23)-Co(1)-C(25) | 69.6(5)   |
| C(24)-Co(1)-C(25) | 40.9(3)   |
| C(20)-Co(1)-C(25) | 158(2)    |
| C(23)-Co(1)-C(16) | 115.8(12) |
| C(24)-Co(1)-C(16) | 154.1(17) |
| C(20)-Co(1)-C(16) | 41.1(5)   |
| C(25)-Co(1)-C(16) | 160(2)    |
| C(23)-Co(1)-C(19) | 132.9(15) |
| C(24)-Co(1)-C(19) | 114.4(6)  |
| C(20)-Co(1)-C(19) | 41.1(4)   |
| C(25)-Co(1)-C(19) | 123.1(16) |
| C(16)-Co(1)-C(19) | 68.6(6)   |
| C(23)-Co(1)-C(17) | 147.2(14) |

|                   |           |
|-------------------|-----------|
| C(24)-Co(1)-C(17) | 164.8(17) |
| C(20)-Co(1)-C(17) | 69.2(4)   |
| C(25)-Co(1)-C(17) | 124.4(15) |
| C(16)-Co(1)-C(17) | 40.9(4)   |
| C(19)-Co(1)-C(17) | 68.4(4)   |
| C(23)-Co(1)-C(22) | 40.9(4)   |
| C(24)-Co(1)-C(22) | 69.1(4)   |
| C(20)-Co(1)-C(22) | 125.7(19) |
| C(25)-Co(1)-C(22) | 68.5(4)   |
| C(16)-Co(1)-C(22) | 102.4(10) |
| C(19)-Co(1)-C(22) | 167(2)    |
| C(17)-Co(1)-C(22) | 111.8(9)  |
| C(23)-Co(1)-C(18) | 171.6(16) |
| C(24)-Co(1)-C(18) | 131.8(13) |
| C(20)-Co(1)-C(18) | 68.7(6)   |
| C(25)-Co(1)-C(18) | 109.2(10) |
| C(16)-Co(1)-C(18) | 68.3(4)   |
| C(19)-Co(1)-C(18) | 40.3(5)   |
| C(17)-Co(1)-C(18) | 40.5(4)   |
| C(22)-Co(1)-C(18) | 147.1(15) |
| C(23)-Co(1)-C(21) | 68.1(4)   |
| C(24)-Co(1)-C(21) | 67.9(5)   |
| C(20)-Co(1)-C(21) | 161(2)    |
| C(25)-Co(1)-C(21) | 40.2(4)   |
| C(16)-Co(1)-C(21) | 121.9(18) |
| C(19)-Co(1)-C(21) | 153(2)    |
| C(17)-Co(1)-C(21) | 102.6(8)  |
| C(22)-Co(1)-C(21) | 39.9(4)   |
| C(18)-Co(1)-C(21) | 116.8(13) |
| C(20)-C(16)-C(17) | 108.3(7)  |
| C(20)-C(16)-Co(1) | 68.5(11)  |
| C(17)-C(16)-Co(1) | 70.4(12)  |
| C(20)-C(16)-H(16) | 125.8     |
| C(17)-C(16)-H(16) | 125.9     |
| Co(1)-C(16)-H(16) | 126.8     |
| C(16)-C(17)-C(18) | 107.5(7)  |



|                   |          |
|-------------------|----------|
| C(16)-C(17)-Co(1) | 68.7(13) |
| C(18)-C(17)-Co(1) | 70.6(14) |
| C(16)-C(17)-H(17) | 126.2    |
| C(18)-C(17)-H(17) | 126.3    |
| Co(1)-C(17)-H(17) | 126.0    |
| C(19)-C(18)-C(17) | 107.8(7) |
| C(19)-C(18)-Co(1) | 68.6(11) |
| C(17)-C(18)-Co(1) | 68.8(13) |
| C(19)-C(18)-H(18) | 126.1    |
| C(17)-C(18)-H(18) | 126.1    |
| Co(1)-C(18)-H(18) | 128.0    |
| C(18)-C(19)-C(20) | 108.4(7) |
| C(18)-C(19)-Co(1) | 71.1(13) |
| C(20)-C(19)-Co(1) | 68.0(10) |
| C(18)-C(19)-H(19) | 125.8    |
| C(20)-C(19)-H(19) | 125.8    |
| Co(1)-C(19)-H(19) | 126.6    |
| C(16)-C(20)-C(19) | 107.9(7) |
| C(16)-C(20)-Co(1) | 70.4(13) |
| C(19)-C(20)-Co(1) | 70.9(11) |
| C(16)-C(20)-H(20) | 126.1    |
| C(19)-C(20)-H(20) | 126.0    |
| Co(1)-C(20)-H(20) | 126.0    |
| C(25)-C(21)-C(22) | 107.6(7) |
| C(25)-C(21)-Co(1) | 66.5(9)  |
| C(22)-C(21)-Co(1) | 68.3(10) |
| C(25)-C(21)-H(21) | 126.2    |
| C(22)-C(21)-H(21) | 126.2    |
| Co(1)-C(21)-H(21) | 130.6    |
| C(23)-C(22)-C(21) | 107.6(7) |
| C(23)-C(22)-Co(1) | 66.3(11) |
| C(21)-C(22)-Co(1) | 71.8(10) |
| C(23)-C(22)-H(22) | 126.2    |
| C(21)-C(22)-H(22) | 126.2    |
| Co(1)-C(22)-H(22) | 127.1    |
| C(22)-C(23)-C(24) | 108.2(7) |

|                   |           |
|-------------------|-----------|
| C(22)-C(23)-Co(1) | 72.8(11)  |
| C(24)-C(23)-Co(1) | 69.1(9)   |
| C(22)-C(23)-H(23) | 125.9     |
| C(24)-C(23)-H(23) | 125.9     |
| Co(1)-C(23)-H(23) | 123.8     |
| C(25)-C(24)-C(23) | 108.3(7)  |
| C(25)-C(24)-Co(1) | 71.1(10)  |
| C(23)-C(24)-Co(1) | 68.9(10)  |
| C(25)-C(24)-H(24) | 125.9     |
| C(23)-C(24)-H(24) | 125.9     |
| Co(1)-C(24)-H(24) | 125.9     |
| C(24)-C(25)-C(21) | 108.3(7)  |
| C(24)-C(25)-Co(1) | 68.0(9)   |
| C(21)-C(25)-Co(1) | 73.3(10)  |
| C(24)-C(25)-H(25) | 125.9     |
| C(21)-C(25)-H(25) | 125.9     |
| Co(1)-C(25)-H(25) | 124.4     |
| C(13)-Co(2)-C(7)  | 130.9(13) |
| C(13)-Co(2)-C(11) | 69.0(12)  |
| C(7)-Co(2)-C(11)  | 123.0(9)  |
| C(13)-Co(2)-C(8)  | 105.6(13) |
| C(7)-Co(2)-C(8)   | 41.5(6)   |
| C(11)-Co(2)-C(8)  | 154.9(9)  |
| C(13)-Co(2)-C(10) | 144.3(15) |
| C(7)-Co(2)-C(10)  | 69.7(11)  |
| C(11)-Co(2)-C(10) | 129.5(12) |
| C(8)-Co(2)-C(10)  | 69.5(10)  |
| C(13)-Co(2)-C(15) | 68.5(11)  |
| C(7)-Co(2)-C(15)  | 154.1(8)  |
| C(11)-Co(2)-C(15) | 40.6(6)   |
| C(8)-Co(2)-C(15)  | 162.0(6)  |
| C(10)-Co(2)-C(15) | 104.8(12) |
| C(13)-Co(2)-C(6)  | 171.8(14) |
| C(7)-Co(2)-C(6)   | 41.0(7)   |
| C(11)-Co(2)-C(6)  | 113.0(14) |
| C(8)-Co(2)-C(6)   | 69.0(11)  |

|                   |           |
|-------------------|-----------|
| C(10)-Co(2)-C(6)  | 40.9(8)   |
| C(15)-Co(2)-C(6)  | 118.5(11) |
| C(13)-Co(2)-C(12) | 40.5(8)   |
| C(7)-Co(2)-C(12)  | 114.4(13) |
| C(11)-Co(2)-C(12) | 40.3(7)   |
| C(8)-Co(2)-C(12)  | 120.0(11) |
| C(10)-Co(2)-C(12) | 169.8(13) |
| C(15)-Co(2)-C(12) | 67.3(10)  |
| C(6)-Co(2)-C(12)  | 136.1(16) |
| C(13)-Co(2)-C(14) | 40.3(7)   |
| C(7)-Co(2)-C(14)  | 166.0(9)  |
| C(11)-Co(2)-C(14) | 67.4(10)  |
| C(8)-Co(2)-C(14)  | 125.0(8)  |
| C(10)-Co(2)-C(14) | 112.1(13) |
| C(15)-Co(2)-C(14) | 39.9(6)   |
| C(6)-Co(2)-C(14)  | 147.9(13) |
| C(12)-Co(2)-C(14) | 66.4(11)  |
| C(13)-Co(2)-C(9)  | 112.6(13) |
| C(7)-Co(2)-C(9)   | 68.6(10)  |
| C(11)-Co(2)-C(9)  | 164.4(9)  |
| C(8)-Co(2)-C(9)   | 40.6(6)   |
| C(10)-Co(2)-C(9)  | 40.7(7)   |
| C(15)-Co(2)-C(9)  | 124.4(8)  |
| C(6)-Co(2)-C(9)   | 67.8(11)  |
| C(12)-Co(2)-C(9)  | 149.0(12) |
| C(14)-Co(2)-C(9)  | 103.2(9)  |
| C(7)-C(6)-C(10)   | 107.8(8)  |
| C(7)-C(6)-Co(2)   | 67.7(17)  |
| C(10)-C(6)-Co(2)  | 68.5(18)  |
| C(7)-C(6)-H(6)    | 126.1     |
| C(10)-C(6)-H(6)   | 126.1     |
| Co(2)-C(6)-H(6)   | 129.4     |
| C(6)-C(7)-C(8)    | 108.1(8)  |
| C(6)-C(7)-Co(2)   | 71.3(19)  |
| C(8)-C(7)-Co(2)   | 69.5(13)  |
| C(6)-C(7)-H(7)    | 125.9     |

|                   |          |
|-------------------|----------|
| C(8)-C(7)-H(7)    | 125.9    |
| Co(2)-C(7)-H(7)   | 124.8    |
| C(9)-C(8)-C(7)    | 107.9(8) |
| C(9)-C(8)-Co(2)   | 72.0(13) |
| C(7)-C(8)-Co(2)   | 68.9(13) |
| C(9)-C(8)-H(8)    | 126.1    |
| C(7)-C(8)-H(8)    | 126.1    |
| Co(2)-C(8)-H(8)   | 124.6    |
| C(8)-C(9)-C(10)   | 108.0(8) |
| C(8)-C(9)-Co(2)   | 67.3(12) |
| C(10)-C(9)-Co(2)  | 67.7(17) |
| C(8)-C(9)-H(9)    | 126.0    |
| C(10)-C(9)-H(9)   | 126.0    |
| Co(2)-C(9)-H(9)   | 130.5    |
| C(9)-C(10)-C(6)   | 107.8(8) |
| C(9)-C(10)-Co(2)  | 71.6(16) |
| C(6)-C(10)-Co(2)  | 70.6(18) |
| C(9)-C(10)-H(10)  | 126.1    |
| C(6)-C(10)-H(10)  | 126.1    |
| Co(2)-C(10)-H(10) | 123.3    |
| C(15)-C(11)-C(12) | 107.8(8) |
| C(15)-C(11)-Co(2) | 70.4(13) |
| C(12)-C(11)-Co(2) | 71.9(17) |
| C(15)-C(11)-H(11) | 126.1    |
| C(12)-C(11)-H(11) | 126.1    |
| Co(2)-C(11)-H(11) | 123.3    |
| C(11)-C(12)-C(13) | 107.8(8) |
| C(11)-C(12)-Co(2) | 67.8(16) |
| C(13)-C(12)-Co(2) | 67(2)    |
| C(11)-C(12)-H(12) | 126.1    |
| C(13)-C(12)-H(12) | 126.1    |
| Co(2)-C(12)-H(12) | 130.4    |
| C(14)-C(13)-C(12) | 107.5(9) |
| C(14)-C(13)-Co(2) | 72.8(19) |
| C(12)-C(13)-Co(2) | 72.3(18) |
| C(14)-C(13)-H(13) | 126.2    |

|                   |          |
|-------------------|----------|
| C(12)-C(13)-H(13) | 126.2    |
| Co(2)-C(13)-H(13) | 120.5    |
| C(15)-C(14)-C(13) | 108.0(8) |
| C(15)-C(14)-Co(2) | 68.3(13) |
| C(13)-C(14)-Co(2) | 67(2)    |
| C(15)-C(14)-H(14) | 126.0    |
| C(13)-C(14)-H(14) | 126.0    |
| Co(2)-C(14)-H(14) | 130.3    |
| C(14)-C(15)-C(11) | 108.1(8) |
| C(14)-C(15)-Co(2) | 71.9(14) |
| C(11)-C(15)-Co(2) | 69.0(13) |
| C(14)-C(15)-H(15) | 126.0    |
| C(11)-C(15)-H(15) | 126.0    |
| Co(2)-C(15)-H(15) | 124.8    |

---

Symmetry transformations used to generate equivalent atoms:

#1  $-x+1, z+1/4, y-1/4$  #2  $y-1/4, -z+1, x-1/4$  #3  $-y+5/4, x, -z+3/4$

#4  $z+1/4, x+1/4, -y+1$

Table S4. Anisotropic displacement parameters ( $\text{\AA}^2 \times 10^3$ ) for **Cp<sub>2</sub>Co<sup>+</sup>-sod-ZMOF**. The anisotropic displacement factor exponent takes the form:  $-2p^2[ h^2a^*2U^{11} + \dots + 2 h k a^* b^* U^{12} ]$

|       | U <sup>11</sup> | U <sup>22</sup> | U <sup>33</sup> | U <sup>23</sup> | U <sup>13</sup> | U <sup>12</sup> |
|-------|-----------------|-----------------|-----------------|-----------------|-----------------|-----------------|
| In(1) | 27(1)           | 30(1)           | 30(1)           | -8(1)           | -1(1)           | 1(1)            |
| O(1)  | 46(1)           | 43(1)           | 45(1)           | 5(1)            | 18(1)           | 1(1)            |
| O(3)  | 39(1)           | 41(1)           | 31(1)           | -16(1)          | -2(1)           | 3(1)            |
| N(1)  | 34(1)           | 30(1)           | 26(1)           | -6(1)           | 7(1)            | -1(1)           |
| N(2)  | 31(1)           | 31(1)           | 26(1)           | -9(1)           | 5(1)            | -2(1)           |
| C(1)  | 32(1)           | 32(1)           | 25(1)           | -7(1)           | 7(1)            | -2(1)           |
| C(2)  | 39(1)           | 37(1)           | 24(1)           | -5(1)           | 9(1)            | 3(1)            |
| C(3)  | 37(1)           | 38(1)           | 24(1)           | -8(1)           | 6(1)            | 1(1)            |
| C(4)  | 47(2)           | 48(2)           | 28(1)           | -14(1)          | 3(1)            | 5(1)            |
| C(5)  | 49(2)           | 43(2)           | 35(2)           | -1(1)           | 16(1)           | 3(1)            |
| O(2B) | 69(8)           | 69(6)           | 30(4)           | -8(4)           | 22(4)           | 2(6)            |
| O(4B) | 65(6)           | 62(7)           | 28(3)           | -18(3)          | 12(3)           | 3(5)            |
| O(2A) | 59(12)          | 60(10)          | 39(8)           | -11(7)          | 25(7)           | -8(8)           |
| O(4A) | 64(12)          | 50(11)          | 34(7)           | -22(6)          | 19(8)           | -5(7)           |
| Co(1) | 29(1)           | 29(1)           | 29(1)           | 2(1)            | 2(1)            | -2(1)           |
| C(16) | 28(8)           | 41(9)           | 36(11)          | 7(6)            | 6(7)            | 6(7)            |
| C(17) | 32(8)           | 21(7)           | 31(5)           | 0(4)            | 0(5)            | 1(5)            |
| C(18) | 43(8)           | 19(6)           | 30(10)          | 3(5)            | 1(5)            | 3(6)            |
| C(19) | 44(12)          | 34(7)           | 30(8)           | -6(6)           | 6(7)            | -16(5)          |
| C(20) | 33(7)           | 46(12)          | 38(9)           | 6(7)            | -5(6)           | -14(5)          |
| C(21) | 17(6)           | 25(8)           | 48(8)           | -4(5)           | -4(6)           | -10(5)          |
| C(22) | 28(6)           | 22(4)           | 26(7)           | -3(4)           | -4(5)           | -2(4)           |
| C(23) | 31(7)           | 27(9)           | 33(7)           | -3(5)           | -4(5)           | -10(4)          |
| C(24) | 34(9)           | 34(7)           | 38(7)           | -14(5)          | 13(5)           | -8(6)           |
| C(25) | 27(6)           | 36(8)           | 48(11)          | 1(7)            | 13(5)           | 4(6)            |
| Co(2) | 38(1)           | 38(1)           | 38(1)           | 2(1)            | -2(1)           | -2(1)           |
| C(6)  | 51(13)          | 58(11)          | 29(9)           | 1(8)            | 0(8)            | -5(11)          |
| C(7)  | 53(13)          | 49(11)          | 32(10)          | 8(8)            | -8(7)           | -12(9)          |
| C(8)  | 44(12)          | 54(10)          | 45(12)          | 6(8)            | -5(10)          | -23(8)          |
| C(9)  | 43(10)          | 69(15)          | 33(10)          | 13(10)          | -4(7)           | -18(8)          |
| C(10) | 41(11)          | 59(13)          | 43(13)          | 13(9)           | 3(9)            | -8(9)           |

|       |        |        |        |       |        |         |
|-------|--------|--------|--------|-------|--------|---------|
| C(11) | 34(10) | 67(14) | 48(13) | 9(10) | -7(8)  | -16(9)  |
| C(12) | 32(9)  | 73(14) | 55(14) | 4(12) | 3(8)   | -10(9)  |
| C(13) | 47(14) | 76(15) | 41(12) | 1(10) | 7(10)  | -26(10) |
| C(14) | 43(11) | 89(19) | 36(10) | 19(9) | -3(7)  | -24(11) |
| C(15) | 47(13) | 66(11) | 46(13) | 22(9) | -5(10) | -15(8)  |

---

Table S5. Hydrogen coordinates ( $\times 10^4$ ) and isotropic displacement parameters ( $\text{\AA}^2 \times 10^3$ ) for **Cp<sub>2</sub>Co<sup>+</sup>-sod-ZMOF**.

|       | x    | y    | z    | U(eq) |
|-------|------|------|------|-------|
| H(1)  | 5460 | 6987 | 4025 | 36    |
| H(2B) | 5941 | 6665 | 2711 | 84    |
| H(2A) | 6016 | 6602 | 2743 | 79    |
| H(16) | 4957 | 5743 | 2381 | 42    |
| H(17) | 5531 | 5551 | 2710 | 34    |
| H(18) | 5756 | 4968 | 2416 | 37    |
| H(19) | 5336 | 4820 | 1893 | 43    |
| H(20) | 4835 | 5301 | 1859 | 47    |
| H(21) | 6091 | 5993 | 2194 | 36    |
| H(22) | 5494 | 6269 | 1982 | 31    |
| H(23) | 5288 | 5918 | 1428 | 37    |
| H(24) | 5754 | 5421 | 1288 | 42    |
| H(25) | 6224 | 5448 | 1792 | 44    |
| H(6)  | 4872 | 7733 | 3200 | 55    |
| H(7)  | 5103 | 7092 | 3090 | 54    |
| H(8)  | 4745 | 6823 | 2564 | 57    |
| H(9)  | 4284 | 7295 | 2358 | 58    |
| H(10) | 4417 | 7882 | 2700 | 57    |
| H(11) | 5589 | 7904 | 2597 | 60    |
| H(12) | 5702 | 7278 | 2339 | 64    |
| H(13) | 5178 | 7132 | 1920 | 66    |
| H(14) | 4852 | 7722 | 1792 | 67    |
| H(15) | 5069 | 8182 | 2249 | 63    |



Table S6. Torsion angles [°] for **Cp<sub>2</sub>Co<sup>+</sup>-sod-ZMOF**.

---

|                         |             |
|-------------------------|-------------|
| C(3)-N(2)-C(1)-N(1)     | -0.5(3)     |
| In(1)-N(2)-C(1)-N(1)    | 172.9(2)    |
| C(2)-N(1)-C(1)-N(2)     | 0.4(3)      |
| In(1)#4-N(1)-C(1)-N(2)  | -174.67(19) |
| C(1)-N(1)-C(2)-C(3)     | -0.2(3)     |
| In(1)#4-N(1)-C(2)-C(3)  | 175.05(19)  |
| C(1)-N(1)-C(2)-C(5)     | 178.9(3)    |
| In(1)#4-N(1)-C(2)-C(5)  | -5.9(4)     |
| C(1)-N(2)-C(3)-C(2)     | 0.3(3)      |
| In(1)-N(2)-C(3)-C(2)    | -175.0(2)   |
| C(1)-N(2)-C(3)-C(4)     | -178.7(3)   |
| In(1)-N(2)-C(3)-C(4)    | 6.0(3)      |
| N(1)-C(2)-C(3)-N(2)     | -0.1(4)     |
| C(5)-C(2)-C(3)-N(2)     | -179.0(3)   |
| N(1)-C(2)-C(3)-C(4)     | 178.7(3)    |
| C(5)-C(2)-C(3)-C(4)     | -0.3(6)     |
| In(1)-O(3)-C(4)-O(4B)   | -167(2)     |
| In(1)-O(3)-C(4)-O(4A)   | 169(4)      |
| In(1)-O(3)-C(4)-C(3)    | 3.2(4)      |
| N(2)-C(3)-C(4)-O(3)     | -6.3(4)     |
| C(2)-C(3)-C(4)-O(3)     | 175.0(3)    |
| N(2)-C(3)-C(4)-O(4B)    | 165.2(19)   |
| C(2)-C(3)-C(4)-O(4B)    | -14(2)      |
| N(2)-C(3)-C(4)-O(4A)    | -173(4)     |
| C(2)-C(3)-C(4)-O(4A)    | 8(4)        |
| C(3)-C(2)-C(5)-O(1)     | -176.3(3)   |
| N(1)-C(2)-C(5)-O(1)     | 4.9(5)      |
| C(3)-C(2)-C(5)-O(2A)    | -8(4)       |
| N(1)-C(2)-C(5)-O(2A)    | 173(4)      |
| C(3)-C(2)-C(5)-O(2B)    | 13(2)       |
| N(1)-C(2)-C(5)-O(2B)    | -166(2)     |
| C(20)-C(16)-C(17)-C(18) | -2.1(18)    |
| Co(1)-C(16)-C(17)-C(18) | -60.2(14)   |
| C(20)-C(16)-C(17)-Co(1) | 58.1(17)    |

|                         |           |
|-------------------------|-----------|
| C(16)-C(17)-C(18)-C(19) | 1.4(17)   |
| Co(1)-C(17)-C(18)-C(19) | -57.6(17) |
| C(16)-C(17)-C(18)-Co(1) | 59.0(13)  |
| C(17)-C(18)-C(19)-C(20) | 0(2)      |
| Co(1)-C(18)-C(19)-C(20) | -58.0(14) |
| C(17)-C(18)-C(19)-Co(1) | 57.8(18)  |
| C(17)-C(16)-C(20)-C(19) | 2(3)      |
| Co(1)-C(16)-C(20)-C(19) | 61.3(13)  |
| C(17)-C(16)-C(20)-Co(1) | -59.3(18) |
| C(18)-C(19)-C(20)-C(16) | -1(3)     |
| Co(1)-C(19)-C(20)-C(16) | -61.0(15) |
| C(18)-C(19)-C(20)-Co(1) | 59.9(16)  |
| C(25)-C(21)-C(22)-C(23) | -2.1(14)  |
| Co(1)-C(21)-C(22)-C(23) | -56.8(11) |
| C(25)-C(21)-C(22)-Co(1) | 54.7(13)  |
| C(21)-C(22)-C(23)-C(24) | -0.1(16)  |
| Co(1)-C(22)-C(23)-C(24) | -60.3(13) |
| C(21)-C(22)-C(23)-Co(1) | 60.3(11)  |
| C(22)-C(23)-C(24)-C(25) | 2(2)      |
| Co(1)-C(23)-C(24)-C(25) | -60.4(13) |
| C(22)-C(23)-C(24)-Co(1) | 62.7(15)  |
| C(23)-C(24)-C(25)-C(21) | -4(2)     |
| Co(1)-C(24)-C(25)-C(21) | -62.6(14) |
| C(23)-C(24)-C(25)-Co(1) | 59.1(13)  |
| C(22)-C(21)-C(25)-C(24) | 3(2)      |
| Co(1)-C(21)-C(25)-C(24) | 59.3(13)  |
| C(22)-C(21)-C(25)-Co(1) | -55.8(13) |
| C(10)-C(6)-C(7)-C(8)    | -3(4)     |
| Co(2)-C(6)-C(7)-C(8)    | -60(2)    |
| C(10)-C(6)-C(7)-Co(2)   | 57(3)     |
| C(6)-C(7)-C(8)-C(9)     | -1(3)     |
| Co(2)-C(7)-C(8)-C(9)    | -61.8(18) |
| C(6)-C(7)-C(8)-Co(2)    | 61(3)     |
| C(7)-C(8)-C(9)-C(10)    | 4(3)      |
| Co(2)-C(8)-C(9)-C(10)   | -55(2)    |
| C(7)-C(8)-C(9)-Co(2)    | 59.9(18)  |

|                         |           |
|-------------------------|-----------|
| C(8)-C(9)-C(10)-C(6)    | -6(4)     |
| Co(2)-C(9)-C(10)-C(6)   | -62(3)    |
| C(8)-C(9)-C(10)-Co(2)   | 55.2(19)  |
| C(7)-C(6)-C(10)-C(9)    | 6(4)      |
| Co(2)-C(6)-C(10)-C(9)   | 62(2)     |
| C(7)-C(6)-C(10)-Co(2)   | -56(3)    |
| C(15)-C(11)-C(12)-C(13) | -6(4)     |
| Co(2)-C(11)-C(12)-C(13) | 55(3)     |
| C(15)-C(11)-C(12)-Co(2) | -62(2)    |
| C(11)-C(12)-C(13)-C(14) | 9(4)      |
| Co(2)-C(12)-C(13)-C(14) | 65(3)     |
| C(11)-C(12)-C(13)-Co(2) | -56(2)    |
| C(12)-C(13)-C(14)-C(15) | -8(4)     |
| Co(2)-C(13)-C(14)-C(15) | 56(2)     |
| C(12)-C(13)-C(14)-Co(2) | -64(3)    |
| C(13)-C(14)-C(15)-C(11) | 5(4)      |
| Co(2)-C(14)-C(15)-C(11) | 59.8(18)  |
| C(13)-C(14)-C(15)-Co(2) | -55(3)    |
| C(12)-C(11)-C(15)-C(14) | 1(3)      |
| Co(2)-C(11)-C(15)-C(14) | -61.6(19) |
| C(12)-C(11)-C(15)-Co(2) | 63(2)     |

---

Symmetry transformations used to generate equivalent atoms:

#1  $-x+1, z+1/4, y-1/4$  #2  $y-1/4, -z+1, x-1/4$  #3  $-y+5/4, x, -z+3/4$

#4  $z+1/4, x+1/4, -y+1$

Table S7. Hydrogen bonds for **Cp<sub>2</sub>Co<sup>+</sup>-sod-ZMOF** [Å and °].

| D-H...A                                                       | d(D-H) | d(H...A) | d(D...A) | <(DHA) |
|---------------------------------------------------------------|--------|----------|----------|--------|
| O(2B <sup>a</sup> )-H(2B <sup>a</sup> )...O(4B <sup>a</sup> ) | 0.84   | 1.66     | 2.50(3)  | 173.5  |
| O(2A <sup>b</sup> )-H(2A <sup>b</sup> )...O(4A <sup>b</sup> ) | 0.84   | 1.69     | 2.52(5)  | 168.0  |

Symmetry transformations used to generate equivalent atoms:

#1  $-x+1, z+1/4, y-1/4$  #2  $y-1/4, -z+1, x-1/4$  #3  $-y+5/4, x, -z+3/4$

#4  $z+1/4, x+1/4, -y+1$
